# Supplementary material for: Dose-dependent effects of Cannabidiol in drinking water on yolk fatty acid profile and hepatic expression of PUFA-related genes in laying hens: insights into the CBD systemic and molecular mechanisms of action
Source: Research Square preprint supplement (doi:10.21203/rs.3.rs-7387031/v1), 2025-09-03
Supplement: Supplementary file 1 [file b0ac14c8d62cd2ae3f5c8689.xlsx]

## Sheet: Diet Information
Table S1. Nutritional value of the diet						Table S2. Feed Composition
Item	Value					Item	Amount (%)
ME for layers (kcal/kg)- calculated	2748					Corn	29.91
Crude protein (g/kg)- calculated	167.79					Wheat	15.8
Crude fiber (g/kg)- calculated	42.91					Triticale	13
Crude ash (g/kg)- calculated	117.52					Post-extraction Rapeseed meal	12
Crude fat (g/kg)- calculated	45.33					Post-extraction Soybean meal	9.8
Lysine (g/kg)- calculated	8.11					Calcium carbonate (limestone)	8.89
Methionine (g/kg)- calculated	3.74					Corn distillers dried grain	5
Total Ca (g/kg)- calculated	35.98					Wheat bran	2.2
Total P (g/kg)- calculated	4.79					Soybean oil	1.9
						Blood products- dried poultry hemoglobin	0.5
						Sodium chloride	0.24
The nutrient composition was calculated based on CVB norms + enzyme (xylanase)						Sodium bicarbonate	0.13
						Monocalcium phosphate	0.12
						Premix1	0.51
						Composition of the 1 kg of premix: Vitamin A, 10000 IU; Vitamin D3, 3000 IU; Vitamin E, 14 IU;
						Copper (copper sulfate 5-hydrate), 10 mg; Iron (ferric sulfate monohydrate), 30 mg;
						Manganese (manganese oxide), 80 mg; Zinc (zinc sulfate monohydrate), 80 mg;
						Iodine (calcium iodine anhydrous), 1 mg; Selenium (sodium selenite), 0.25 mg;
						BHT (E321)1b, 1.04 mg; BHA (E320) 1b, 0.57 mg; Phytase, 900 OUT, Endo 1,4 beta-xylanase, 1500 VU.

## Sheet: CBD. Group I
Table S3. CBD Solution Assessment (Group I)
	Assumed (1st week)	Real (1st week)	Assumed (2nd week)	Real (2nd week)	Assumed (13th week)	Real (13th week)	Assumed (14th week)	Real (14th week)
Body Weight (kg)	1.8	1.7	1.7	1.7	1.8	1.8	1.8	1.8
Water Intake (mL/bird/day)	250	254	250	242	250	212	250	212
Stock Solution Concentration (mg/mL)	100	99.85	100	99.85	100	99.77	100	99.77
Target CBD Dose (mg/kg BW/day)	20		20		20		20
Target CBD Amount per Bird (mg/day)	36		34		36		36
CBD Concentration per Bird(ml/day)	0.36		0.34		0.36		0.36
CBD Concentration in Drinking Water (mg/mL)	0.144	0.169	0.136	0.168	0.144	0.171	0.144	0.17
Actual CBD Intake per bird (mg/day)	-	42.926	-	40.656	-	36.252	-	36.04
Actual CBD Intake per kg BW (mg/kg BW/day)	-	25.2506	-	23.9153	-	20.14	-	20.0222

## Sheet: CBD. Group II
Table S4. CBD Solution Assessment (Group II)
	Assumed (1st week)	Real (1st week)	Assumed (2nd week)	Real (2nd week)	Assumed (13th week)	Real (13th week)	Assumed (14th week)	Real (14th week)
Body Weight (kg)	1.8	1.7	1.7	1.7	1.7	1.7	1.7	1.7
Water Intake (mL/bird/day)	250	255	250	240	250	209	250	205
Stock Solution Concentration (mg/mL)	100	99.85	100	99.85	100	99.77	100	99.77
Target CBD Dose (mg/kg BW/day)	40		40		40		40
Target CBD Amount per Bird (mg/day)	72		68		68		68
CBD Concentration per Bird(ml/day)	0.72		0.68		0.68		0.68
CBD Concentration in Drinking Water (mg/mL)	0.288	0.318	0.272	0.319	0.272	0.321	0.272	0.32
Actual CBD Intake per bird (mg/day)	-	81.09		76.56	-	67.089	-	65.6
Actual CBD Intake per kg BW (mg/kg BW/day)	-	47.7		45.0353	-	39.4641	-	38.5882

## Sheet: CBD. Group III
Table S5. CBD Solution Assessment (Group III)
	Assumed (1st week)	Real (1st week)	Assumed (2nd week)	Real (2nd week)	Assumed (13th week)	Real (13th week)	Assumed (14th week)	Real (14th week)
Body Weight (kg)	1.8	1.7	1.7	1.7	1.7	1.7	1.7	1.7
Water Intake (mL/bird/day)	250	239	250	235	250	212	250	199
Stock Solution Concentration (mg/mL)	100	99.85	100	99.85	100	99.77	100	99.77
Target CBD Dose (mg/kg BW/day)	80		80		80		80
Target CBD Amount per Bird (mg/day)	144		136		136		136
CBD Concentration per Bird(ml/day)	1.44		1.36		1.36		1.36
CBD Concentration in Drinking Water (mg/mL)	0.576	0.581	0.544	0.581	0.544	0.583	0.544	0.582
Actual CBD Intake per bird (mg/day)	-	138.859	-	136.535	-	123.596		115.818
Actual CBD Intake per kg BW (mg/kg BW/day)	-	81.6818	-	80.3147	-	72.7035		68.1282

## Sheet: Primers
Table S6. Primers Sequence
Transcript full name	Gene abbreviation	Sequence 5’-3’	Locus	Product length	Ref. number
Peroxisome proliferator-activated receptor gamma	PPAR-γ	TCCCTCTGACCAAAGCCAAG	741-760	181	NM_001397666.1
		TGACATCGCTGGAAAATGCG	902-921
Fatty acid desaturase 1	FADS1	TCCTCTTCTCTGCGTTGCTTC	719-739	199	XM_421052.7
		AAGCAGTTGGGTTTCGCGT	899-917
Fatty acid desaturase 2	FADS2	CCTTGGCGAAAGTCAGCCTA	917-936	154	NM_001160428.3
		CCTGCGCTTGATCATGGTTG	1051-1070
Beta-actin	ACTB	CTCTGACTGACCGCGTTACT	68-87	181	NM_205518.2
		TCTGGCCCATACCAACCATC	229-248
Glyceraldehyde-3-phosphate dehydrogenase	GAPDH	GGGCACGCCATCACTATCTT	262-281	187	NM_204305.2
		TCACAAACATGGGGGCATCA	429-448

## Sheet: Body Weight (kg)
		Initial	Initial	Middle	Middle	Final	Final
Group	Cage No.	Average	Average/ group	Average	Average/ group	Average	Average/ group
I	25	1.59667	1.73569	1.56667	1.79743	1.61667	1.79264
I	26	1.745		1.79		1.865
I	27	1.63833		1.67833		1.68333
I	28	1.71		1.74333		1.69833
I	29	1.85833		1.86667		1.89333
I	30	1.68667		1.9425		1.975
I	55	1.685		1.77167		1.77167
I	56	1.68833		1.68333		1.71167
I	57	1.89333		1.93833		2.01
I	58	1.76333		1.80333		1.77
I	59	1.72333		1.81333		1.82167
I	60	1.84		1.97167		1.695
II	13	1.705	1.72261	1.75833	1.74542	1.75333	1.70069
II	14	1.76833		1.76833		1.77833
II	15	1.65633		1.62833		1.615
II	16	1.65167		1.52		1.515
II	17	1.745		1.78833		1.56333
II	18	1.67333		1.67167		1.65667
II	43	1.79167		1.73667		1.65167
II	44	1.76333		1.83833		1.84333
II	45	1.755		1.84333		1.80833
II	46	1.68667		1.78667		1.8
II	47	1.705		1.75		1.71167
II	48	1.77		1.855		1.71167
III	7	1.715	1.69114	1.615	1.67431	1.63667	1.65875
III	8	1.49833		1.60833		1.63
III	9	1.82167		1.79833		1.71833
III	10	1.76167		1.62667		1.605
III	11	1.67367		1.75167		1.64333
III	12	1.66333		1.70667		1.64333
III	37	1.70167		1.58167		1.68167
III	38	1.675		1.60667		1.52333
III	39	1.73333		1.75333		1.78667
III	40	1.65833		1.59333		1.75
III	41	1.75667		1.8		1.79333
III	42	1.635		1.65		1.49333

## Sheet: Water Intake (ml)
WI/bird/week (Liter)
Group	Cage No.	1st week	2nd week	13th week	14th week				Average (L)
I	25	1.99475	2.2094	1.72814	1.65604			1st week	2nd week	13th week	14th week
I	26	1.83327	1.76799	1.51137	1.58406		I	1.775	1.6952	1.48499	1.48625
I	27	1.85981	1.44341	1.60768	1.65963		II	1.78837	1.67745	1.46013	1.43541
I	28	1.73575	1.66152	1.62629	1.56927		III	1.67612	1.64675	1.48455	1.39289
I	29	1.55635	1.59821	1.44924	1.50389
I	30	1.76142	1.63881	1.43584	1.47325
I	55	1.79804	1.66747	1.50558	1.43851				Average (ml)
I	56	1.88662	1.75204	1.60958	1.61056			1st week	2nd week	13th week	14th week
I	57	1.64137	1.68142	1.41442	1.40964		I	1775	1695.2	1484.99	1486.25
I	58	1.74709	1.74781	1.65296	1.51563		II	1788.37	1677.45	1460.13	1435.41
I	59	1.61296	1.61296	1.41134	1.45242		III	1676.12	1646.75	1484.55	1392.89
I	60	1.87255	1.56142	0.867411	0.962064
II	13	1.94635	1.69714	1.50426	1.10958
II	14	1.67142	1.63306	1.38237	1.33469				WI/day (ml)
II	15	1.8364	1.73896	1.68589	1.7366			1st week	2nd week	13th week	14th week
II	16	1.75588	1.75019	0.926633	1.17885		I	253.571	242.172	212.141	212.321
II	17	1.70481	1.68142	1.72296	1.74035		II	255.482	239.636	208.59	205.058
II	18	1.73142	1.52309	1.45533	1.49574		III	239.445	235.25	212.079	198.985
II	43	2.02142	1.71442	1.07066	1.05692
II	44	1.82804	1.74281	1.65753	1.73932
II	45	1.75481	1.65752	1.65953	1.64451
II	46	1.63875	1.54819	1.72824	1.63384
II	47	1.77483	1.7575	1.6735	1.63624
II	48	1.79635	1.68509	1.05464	0.918274
III	7	1.76475	1.66216	1.69137	1.72037
III	8	1.40359	1.45973	1.31431	1.32826
III	9	1.5874	1.56819	1.27499	1.03846
III	10	1.60475	1.64142	1.57127	1.60106
III	11	1.48032	1.57745	1.57421	1.63575
III	12	1.64306	1.57757	1.72301	1.73565
III	37	1.85827	1.72624	1.50142	1.02662
III	38	1.63968	1.53614	0.967242	1.04856
III	39	1.66311	1.72806	1.64717	1.62809
III	40	1.75524	1.74206	1.71963	1.21956
III	41	1.97516	1.76352	1.73624	1.73822
III	42	1.73806	1.77847	1.09374	0.994112
